# Supplementary material for: Determinants of functional synaptic connectivity among amygdala-projecting prefrontal cortical neurons in male mice
Source: Springer Nature journal article supplement (doi:10.1038/s41467-023-37318-x), 2023-03-25
Supplement: MOESM1 [file 41467_2023_37318_MOESM1_ESM.pdf]

## Supplementary data

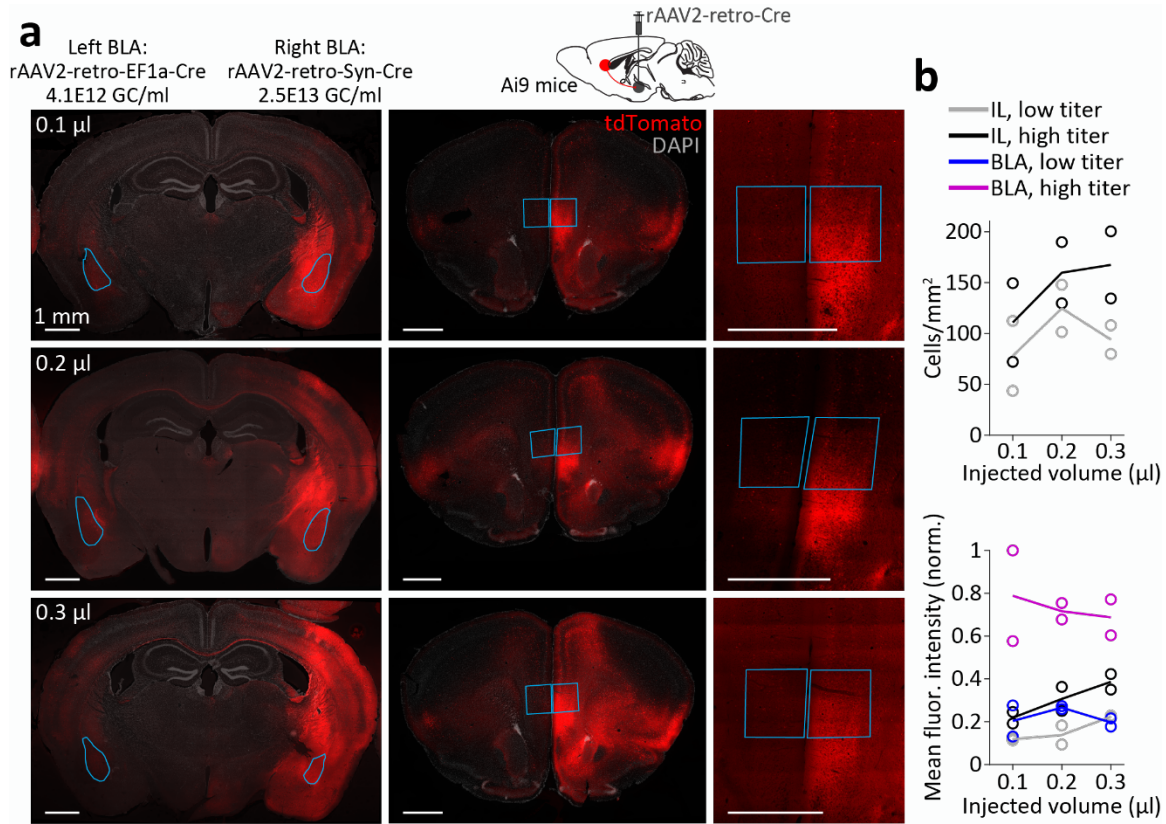

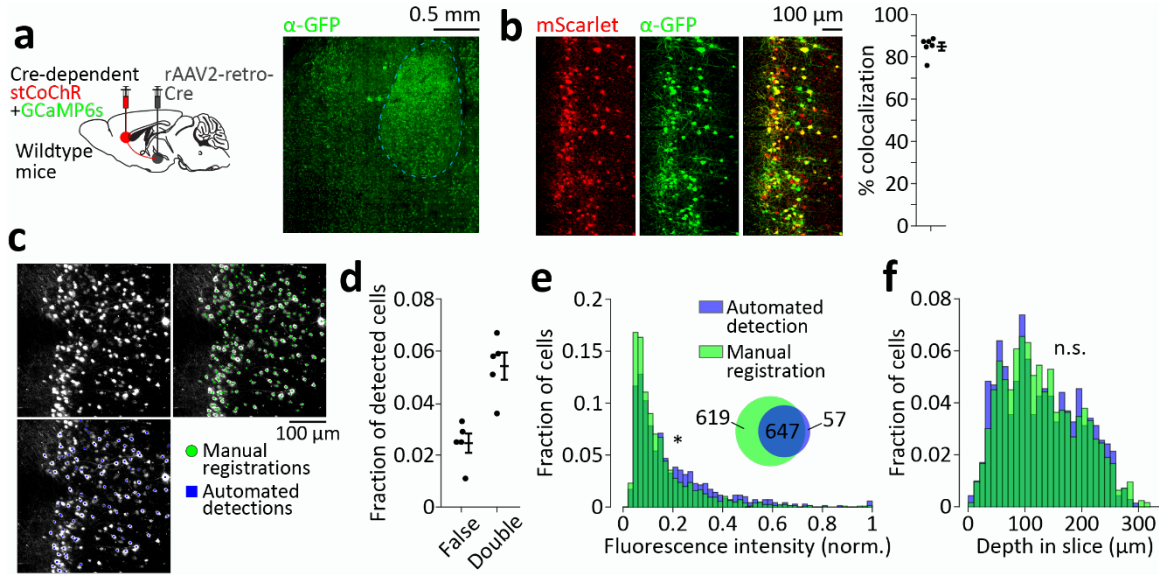

**Figure S2. Retrograde labeling of mPFC-BLA cells and automated detection of cell bodies. a–f,** Injection of rAAV2-retro-Cre into the BLA and Cre-dependent stCoChR and GCaMP6s into the mPFC of wildtype (C57BL/6J) mice to label mPFC-BLA cells. **a**, mPFC-BLA cell labeling strategy (left, sagittal atlas illustration was adapted from ref. 107) and a confocal z-projection image showing axonal labeling in the BLA, visualized using anti-GFP immunostaining to amplify the GCaMP6s fluorescence (right, BLA outlined in dashed cyan). **b**, Confocal images showing expression of mScarlet (co-expressed with stCoChR) and GCaMP6s (amplified using anti-GFP immunostaining) in mPFC-BLA cells (left), and quantification of the co-expression of mScarlet and GCaMP6s in mPFC-BLA cells based on  $n = 6$  images from two mice (right). Co-expression is calculated as the fraction of cells expressing both mScarlet and GCaMP6s out of the total cells expressing either, within an area of  $0.5 \times 1 \text{ mm}^2$  containing the densest expression in the infralimbic cortex. Error bars indicate mean  $\pm$  SEM. **c**, An example two-photon z-projection image used for connectivity mapping (top left), with overlaid labeling of cell bodies registered manually (green, right) and cell bodies detected with the automated algorithm (blue, bottom). **d–f**, Performance of the algorithm for automated detection of cell bodies in a scanned tissue volume. **d**, Fraction of false detections (where detection does not point to a cell) and double detections (where detection points between two adjacent cells) out of a total of 1046 automated detections in  $n = 5$  scanned volumes from two mice. Error bars indicate mean  $\pm$  SEM. **e**, Distribution of fluorescence intensity across automatically detected cells ( $n = 704$ ) and manually registered cells ( $n = 1266$ ) in four scanned volumes from four mice. \* One-tailed, two-sample Kolmogorov-Smirnov test for manually vs. automatically detected cells:  $D_{1266,704} = 0.14$ ,  $p = 2.2 \times 10^{-8}$ . All intensities are normalized to the maximal fluorescence among all cells within the same volume. Bin size is 0.02. Inset shows a Venn diagram of the manually registered and automatically detected cell bodies. **f**, Distribution of cell positions along the depth of the slice for the same cells as in **e**. Two-tailed, two-sample Kolmogorov-Smirnov test:  $D_{1266,704} = 0.04$ ,  $p = 0.49$ . Bin size is 10  $\mu\text{m}$ . Source data are provided as a Source Data file.

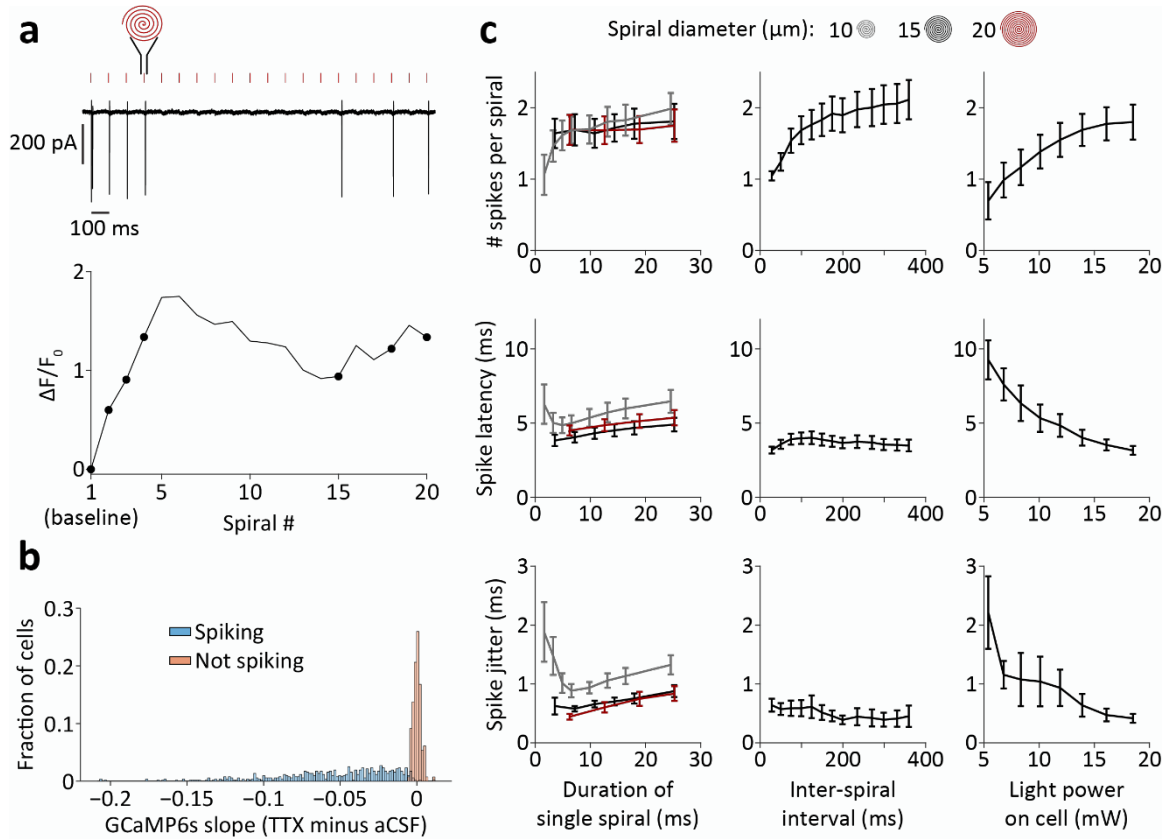

**Figure S3. Spiral stimulation parameters and detection of spiking using GCaMP6s.** **a**, Cell-attached recording (top) and GCaMP6s  $\Delta F/F_0$  (bottom) from an mPFC-BLA cell during a train of 20 spirals (3.56 ms each) delivered at 10 Hz. Red ticks denote spiral-scan periods, and spike-triggering spirals are highlighted by circles over the  $\Delta F/F_0$  trace. **b**, Distribution of the difference between the GCaMP6s fluorescence slope in presence of TTX and its slope in absence of TTX, based on the cells in Figure 1h. The distribution is presented separately for cells that were determined to have spiked (blue) and those that did not spike (red) based on the lower bound of the confidence interval of the GCaMP6s fluorescence slope. Bins are 0.0015. **c**, Cell-attached recordings from mPFC-BLA cells expressing stCoChR and GCaMP6s during scanning with trains of 10 spirals. Diameter and duration of each spiral (left;  $n = 11$  cells; light power on cell = 13.9 mW, inter-spiral interval = 100 ms), time interval between consecutive spirals (middle;  $n = 11$  cells; light power on cell = 13.9 mW, spiral duration = 3.6 ms), and light power on cell (right;  $n = 10$  cells; spiral duration = 3.6 ms, inter-spiral interval = 100 ms) were varied, while the number of evoked spikes per spiral (top), latency to first spike (middle), and jitter of first spike (bottom) were measured. Error bars indicate mean  $\pm$  SEM. See Figure 1i for additional measurements. Source data are provided as a Source Data file.

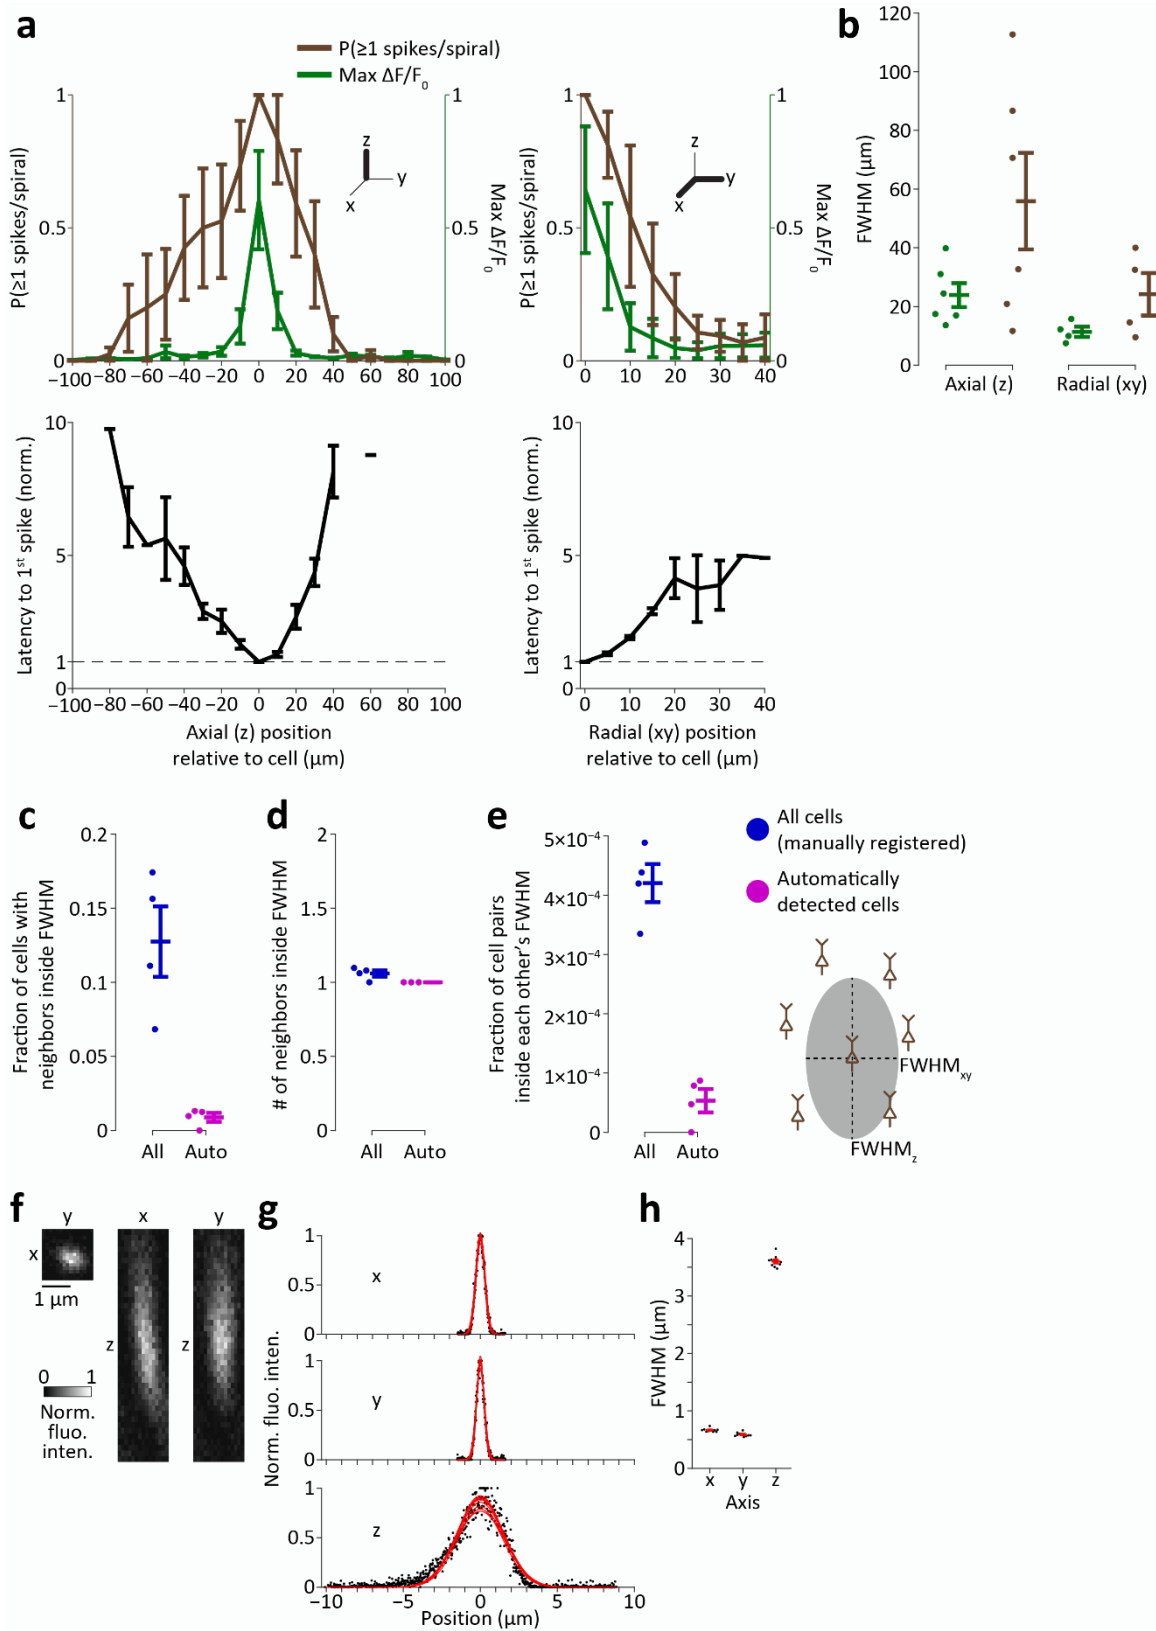

**Figure S4. Spatial specificity of stimulation and imaging relative to the labeled-cell density in the slice preparation.** **a**, Spatial specificity of stimulation and imaging measured using cell-attached recordings from mPFC neurons while spiral patterns were scanned at varying positions relative to the cell (light power 10 mW in focus). Left, Specificity across focal planes (axial, z). Right, Specificity within the focal plane (radial, xy). Top, Probability for evoking at least one spike per spiral (brown) and maximal  $\Delta F/F_0$  in a spiral train (green). Bottom, Latency to first spike, normalized to the latency on the cell.  $n = 6$  cells for axial specificity and  $n = 4$  cells for radial specificity. Here and throughout this figure, error bars indicate mean  $\pm$  SEM. **b**, Full width at half maximum (FWHM) for axial specificity (left, z) and for radial specificity (right, xy), based on individual-cell data in **a**. FWHM of spiking vs.  $\Delta F/F_0$ : Wilcoxon signed rank test,  $p = 0.44$  in z and  $p = 0.12$  in xy. **c**, Fraction of cells in a scanned tissue volume which have at least one neighboring cell that is found within their spiking FWHM ellipsoid. Data is presented for all cells in a volume as registered manually (blue) and for cells detected automatically using the soma-detection algorithm (purple).  $n = 4$  scanned volumes from four mice. **d**, Mean number of within-FWHM-ellipsoid neighbors, among the cells having within-ellipsoid neighbors, in the same scanned volume as in **c**. **e**, Fraction of cell pairs, among all possible pairs in a volume, which reside inside each other's FWHM ellipsoid, in the same scanned volume as in **c**. Bottom right, Diagram describing the cell-density calculations with respect to the FWHM ellipsoid. **f–h**, Point spread function of the two-photon microscope system used in this study. **f**, Cross-section images of an example fluorescent microsphere across three planes. **g**, Fluorescence intensity as a function of the two-photon beam position relative to the microsphere center, across the three microscope axes for  $n = 9$  microspheres. Gaussian fits for each individual microsphere are presented in red. **h**, FWHM of the fluorescence intensity at each axis, based on the Gaussian fits in **g**. Source data are provided as a Source Data file.

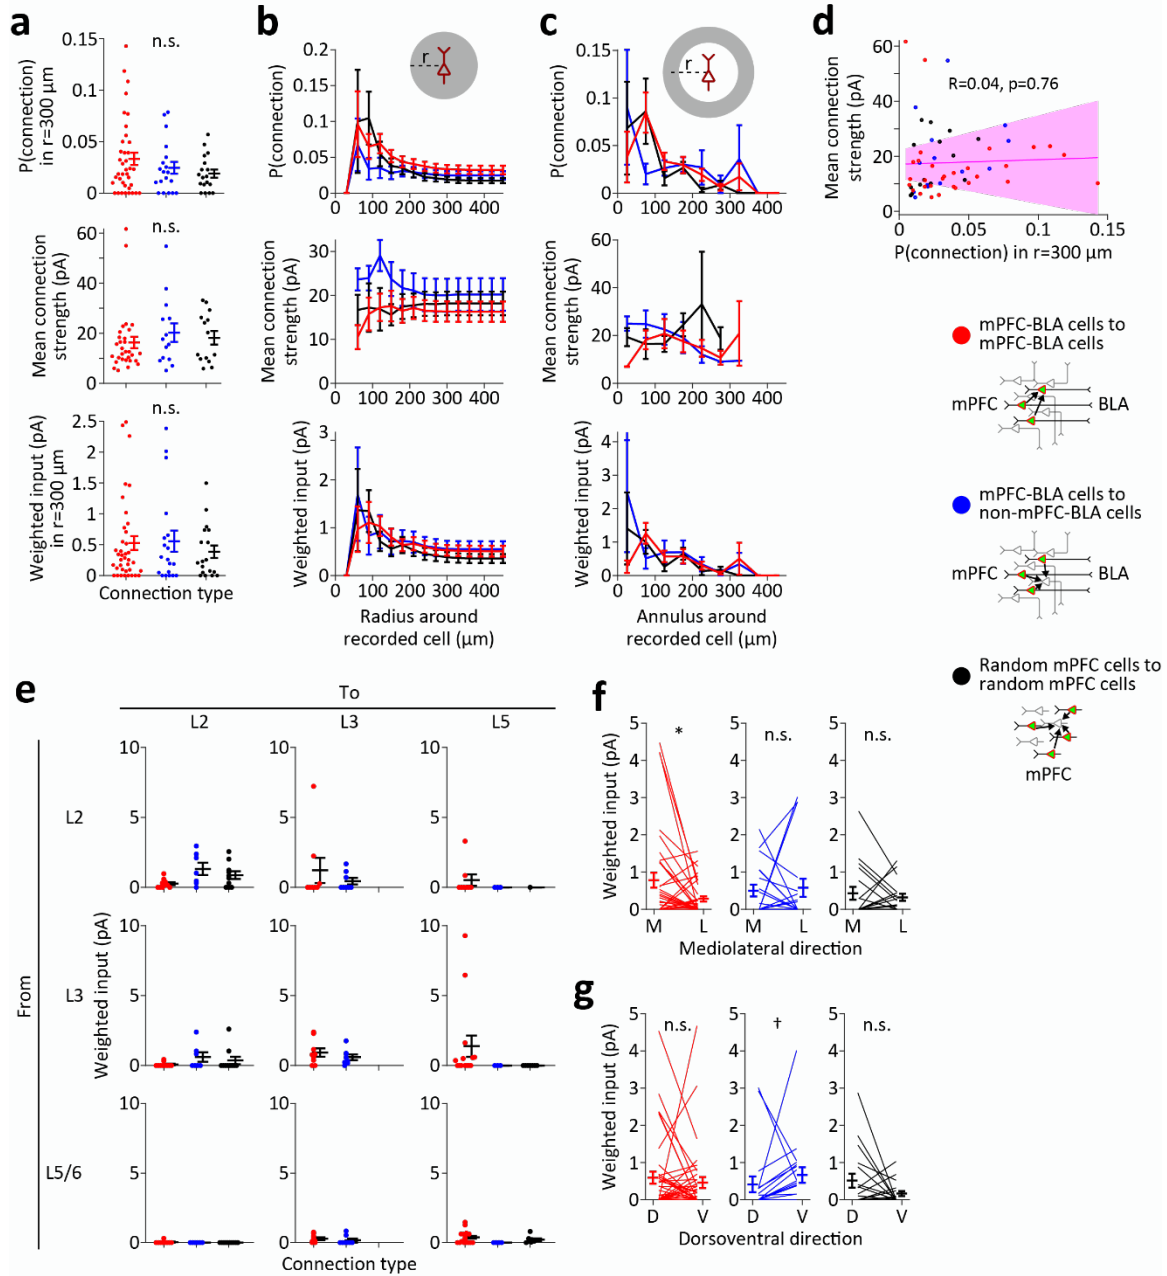

**Figure S5. Anatomical distribution of synaptic connections.** **a**, Overall probability of connection within a distance of 300  $\mu\text{m}$  from the recorded cell (top), mean connection strength (middle, with no restriction to the distance from the recorded cell), and weighted input onto the recorded cell within a 300  $\mu\text{m}$  distance (bottom), for each connection type. Points are individual recorded cells corresponding to single maps. Here and throughout this figure, error bars indicate mean  $\pm$  SEM. Zero probability of connection (and, accordingly, zero weighted input) indicates that the recorded cell did not receive input from the stimulated cells. Kruskal-Wallis test with multiple post hoc comparisons using Tukey's HSD, n.s.  $p \geq 0.52$ . For **a-c**:  $n = 38$  cells in mPFC-BLA to mPFC-BLA connections,  $n = 19$  cells in mPFC-BLA to non-mPFC-BLA connections, and  $n = 18$  cells in random mPFC to random mPFC connections. **b**, Probability of connection (top), connection strength (middle), and weighted input (bottom) as function of the radius of the sphere around the recorded cell where connections are measured. **c**, Probability of connection (top), connection

strength (middle), and weighted input (bottom) as function of the center of the annulus (50  $\mu\text{m}$  thickness) around the recorded cell where connections are measured. **d**, Lack of correlation between the probability of connection and connection strength across all connection types ( $n = 38$  cells in mPFC-BLA to mPFC-BLA connections,  $n = 19$  cells in mPFC-BLA to non-mPFC-BLA connections, and  $n = 18$  cells in random mPFC to random mPFC connections). The line and the shaded region represent the regression line and its 95% confidence bounds, respectively. **e**, Summary of cross-layer connections measured by weighted input. Notice that stimulated (presynaptic) cells in layers 5 and 6 were pooled.  $n$  cells are detailed in Figure 3d. **f**, Weighted synaptic input as function of mediolateral position of the stimulated cells relative to the postsynaptic recorded cell.  $n = 38$  cells in mPFC-BLA to mPFC-BLA connections,  $n = 19$  cells in mPFC-BLA to non-mPFC-BLA connections, and  $n = 18$  cells in random mPFC to random mPFC connections. Wilcoxon signed rank test, \*  $p = 0.029$ ; n.s.  $p \geq 0.67$ . **g**, Weighted synaptic input as function of dorsoventral position relative to the recorded cell.  $n$  cells as in **f**. Wilcoxon signed rank test, †  $p = 0.091$ ; n.s.  $p \geq 0.22$ . Source data are provided as a Source Data file.



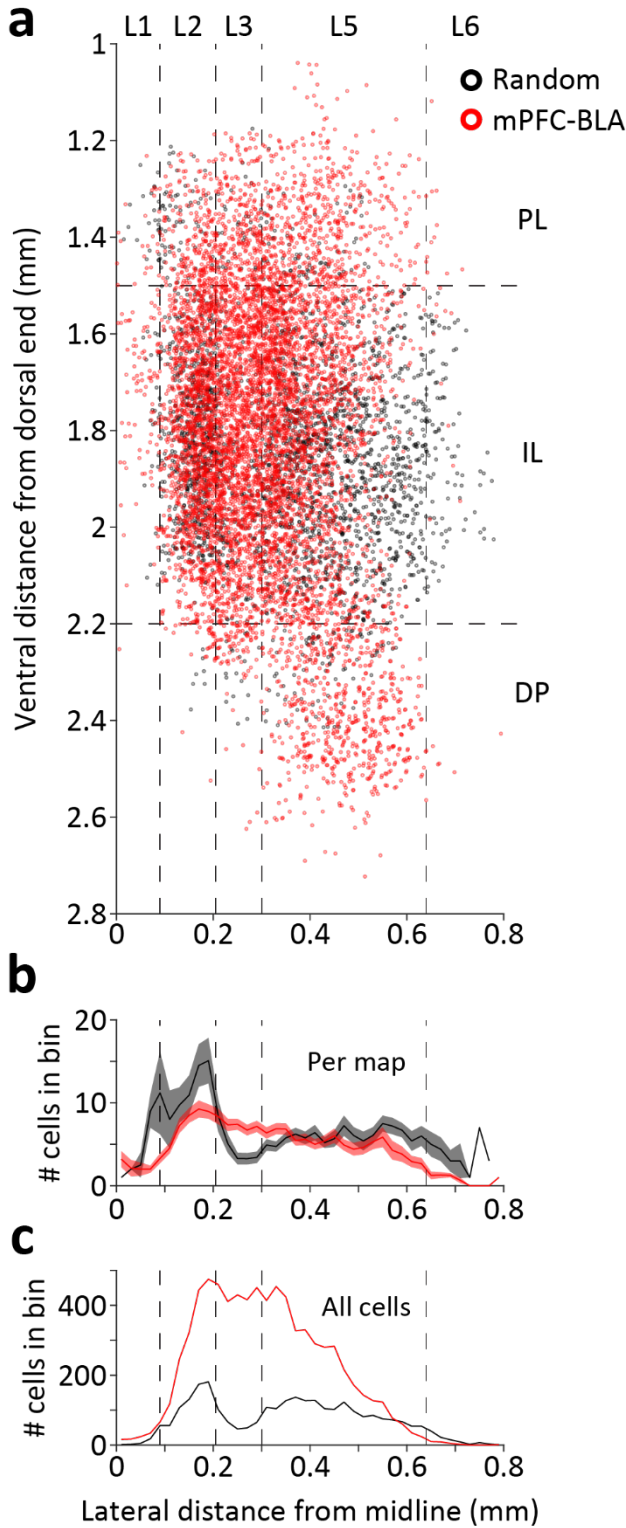

**Figure S6. Distribution of stimulated-cell positions in anatomical space.** **a**, Positions of all cells that were stimulated during recording from corresponding cells located throughout the mPFC (PL, IL, and DP), in dorsoventral (DV) and mediolateral (ML) coordinates. mPFC-BLA cells are in red ( $n = 7737$  cells from 67 experiments corresponding to 67 recorded cells), and randomly labeled mPFC cells are in black ( $n = 2802$  cells from 22 experiments corresponding to 22 recorded cells). Vertical dashed lines indicate division into layers, based on cell density<sup>107</sup> shown in **b** (layer borders: 90, 205, 300, and 640  $\mu\text{m}$  from midline<sup>75</sup>). L1 contains excitatory projection cells, consistent with known presence of L2 cells in L1 of the mPFC<sup>107</sup>. Horizontal dashed lines indicate division into subregions (PL/IL border: 1.5 mm; IL/DP border: 2.2 mm from dorsal midline edge). Notice that the anteroposterior (AP) position was collapsed (range of AP positions in all experiments: 1.2 to 2 mm from bregma), such that the IL/PL/DP borders are not consistent across experiments and are drawn based on average AP position. Borders of L3 were determined based on local reduction in cell density in the random-cell class<sup>107</sup>, and layer borders were consistent with marker expression data<sup>75</sup>. **b**, Number of cells in each experiment in 20  $\mu\text{m}$  bins along the ML axis. Shaded areas indicate SEM. **c**, Total number of cells in all experiments in 20  $\mu\text{m}$  bins. Source data are provided as a Source Data file.



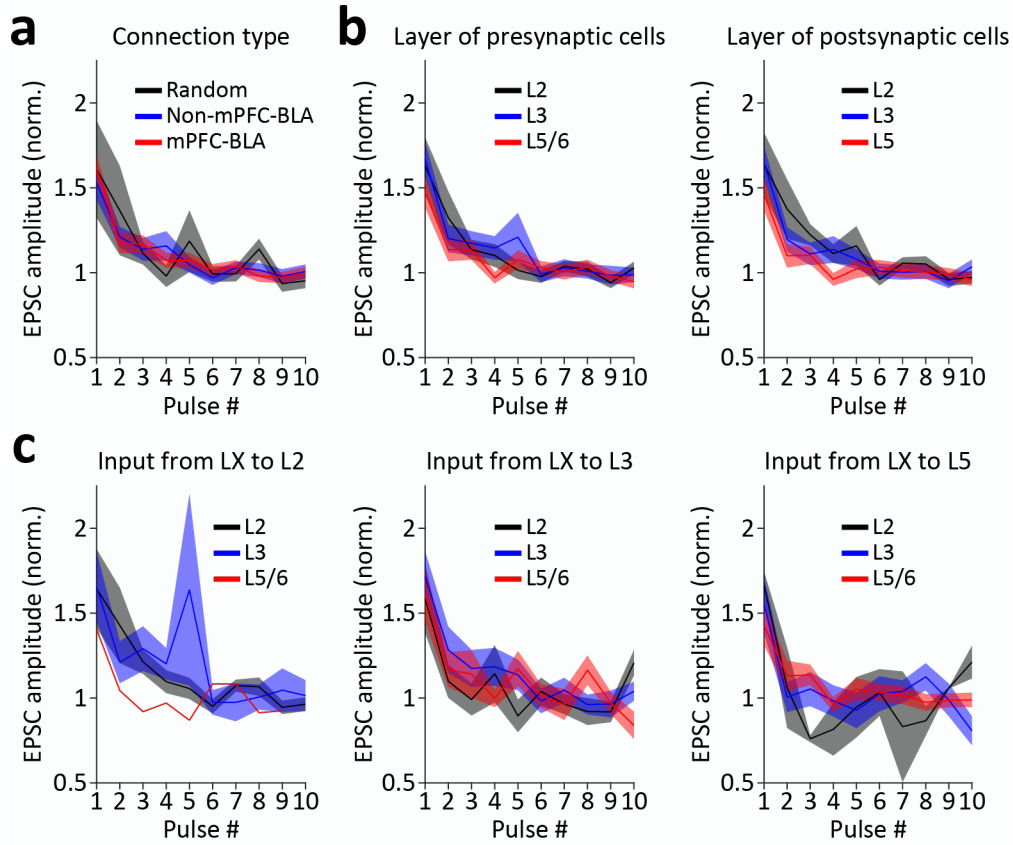

**Figure S7. Short-term plasticity of synaptic connections.** **a**, Amplitude of evoked EPSC as function of the stimulation pulse, normalized to the mean of the last five pulses, for the three connection types as in Figure 3a. Only the first 10 pulses were considered in experiments with a 15-pulse train, and in experiments with multiple repetitions of the stimulation protocol, all repetitions were averaged. Here and throughout this figure, lines are means and shaded regions represent SEM. **b**, Same as **a**, but pooling all connection types and separating according to the layer of the presynaptic cells (left) or layer of the postsynaptic cells (right). **c**, Same as **b**, but pooled according to both the presynaptic and the postsynaptic cell layer. Source data are provided as a Source Data file.

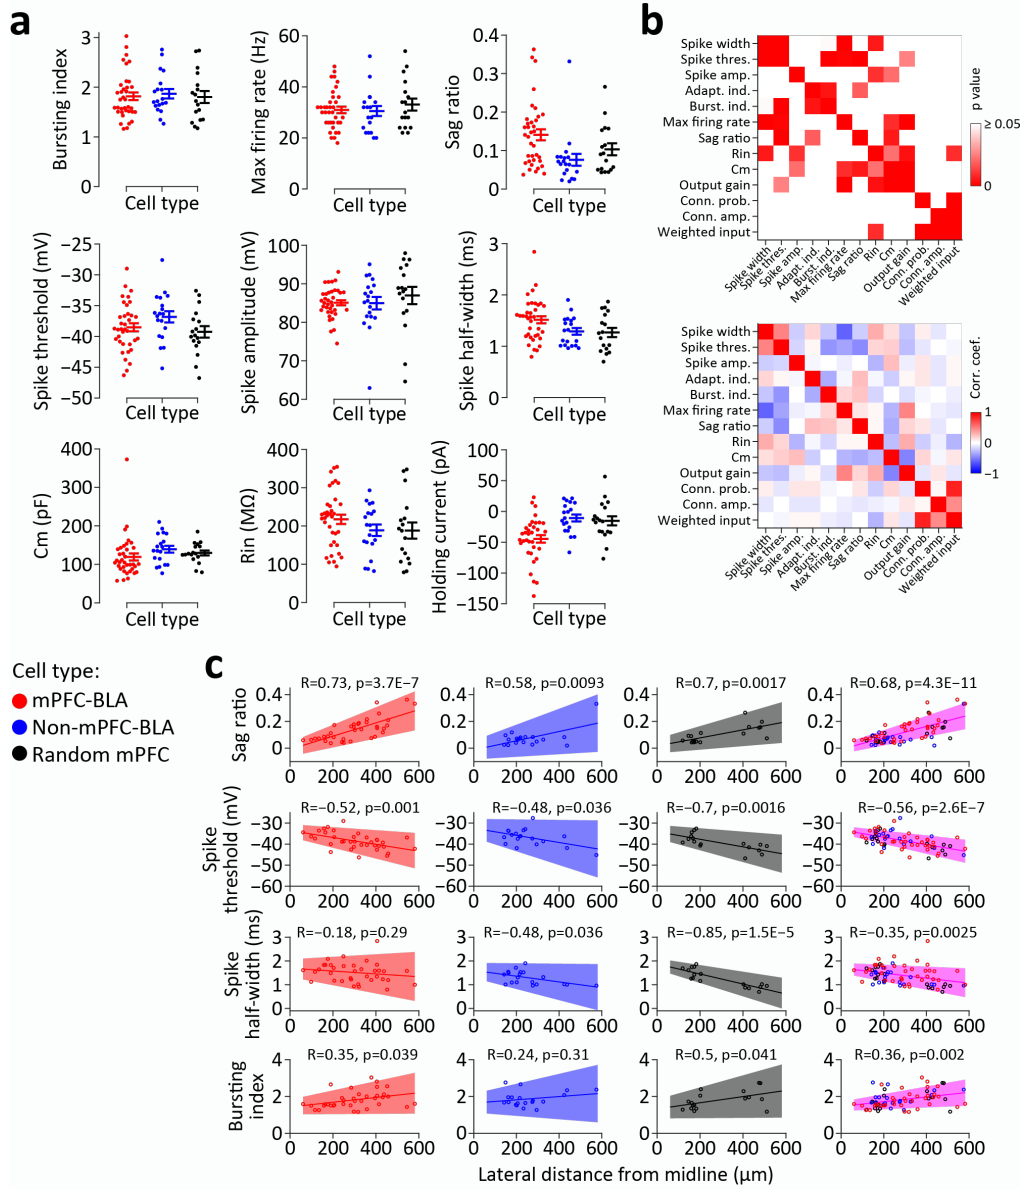

**Figure S8. Electrophysiological properties of pyramidal neuron populations in the ventral mPFC. a,** Electrophysiological properties of the different cell types. Color code as in Figure 4. Error bars indicate mean  $\pm$  SEM. See Figure 4b–e for additional properties. Notice that the apparent difference in sag ratio between the cell types stems from this parameter's correlation with mediolateral position (c) and the larger fraction of mPFC-BLA cells in L5 compared with the other cell types (Table S1). **b,** Pairwise correlations between electrophysiological properties and connectivity properties. Top, P values of pairwise Pearson correlations. Bottom, Correlation coefficients for pairwise Pearson correlations. Connection probability, connection amplitude, and weighted input are calculated as in Figure S5a. **c,** Correlation between cells' mediolateral position and their electrophysiological properties, for each cell type separately (three left columns) and for all cells pooled (right column). In each plot, each point represents a cell, the line is a linear fit, and the shaded region represents the 95% confidence intervals of the linear fit. Magenta (right column) represents fits for all cells pooled (individual cells are color-coded by type). Source data are provided as a Source Data file.

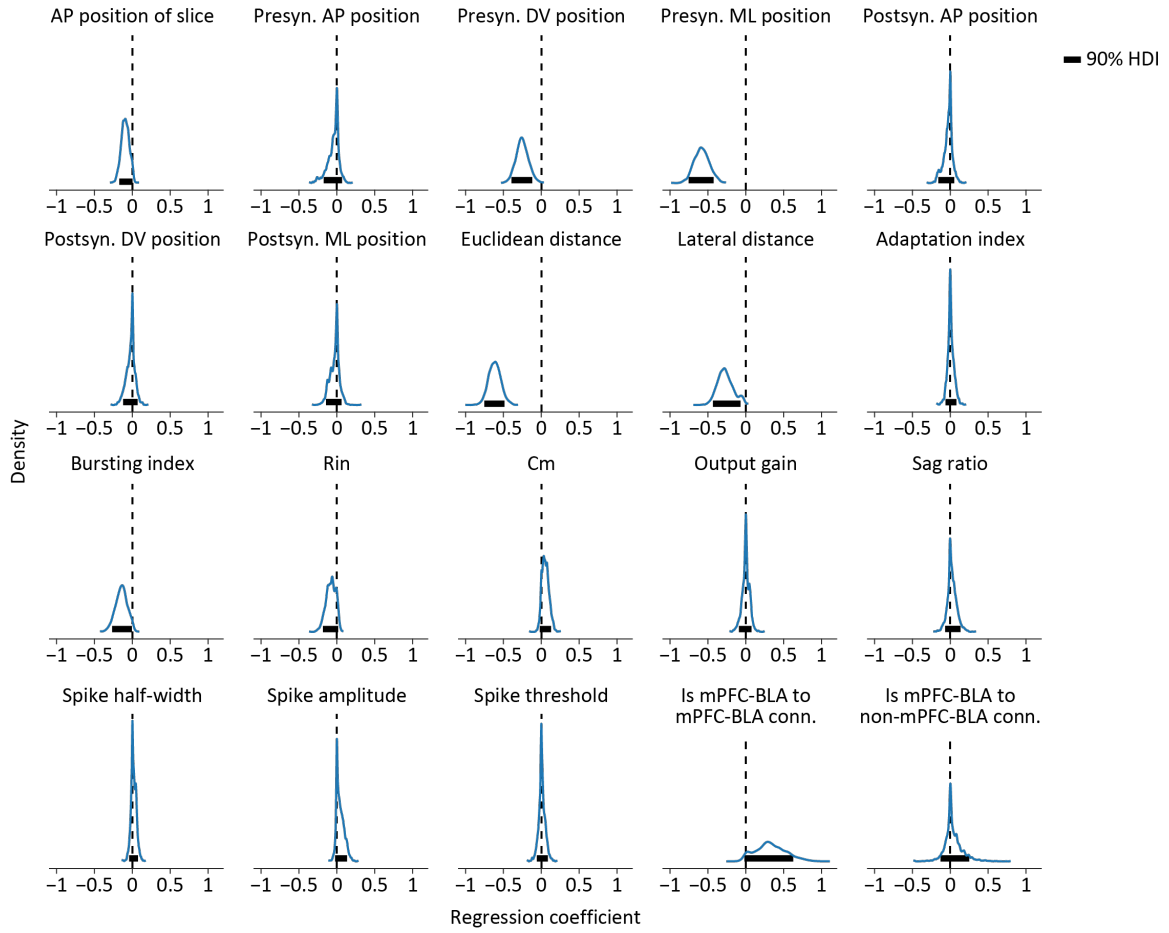

**Figure S9. Posterior distributions of regression coefficients calculated using Horseshoe priors.** Thick horizontal lines represent the 90% highest density interval (HDI). Density scaling is identical for all features. See Figure 4h for summary of the distributions.

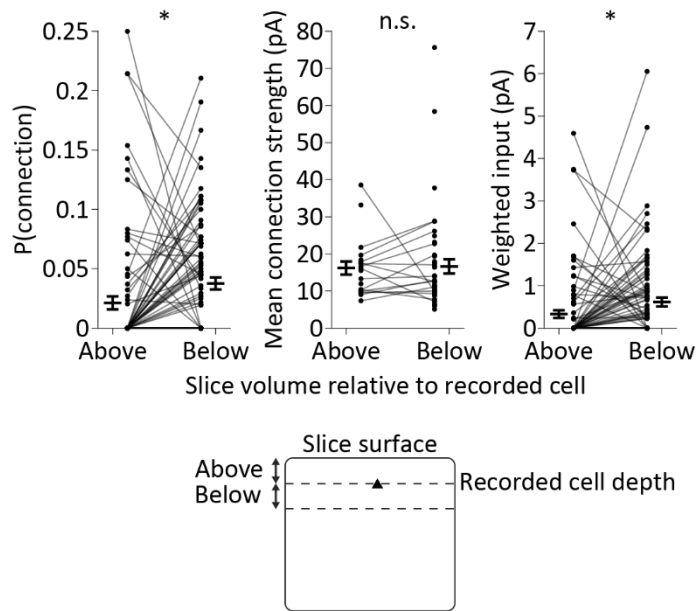

**Figure S10. Connectivity properties arising from the slice volume located above the recorded cell and from an equally sized volume below the recorded cell.**  $n = 92$  cells of all types in the entire mPFC. Wilcoxon signed rank test, \*  $p = 0.006$ ; n.s.  $p = 0.30$ . Error bars indicate mean  $\pm$  SEM. Source data are provided as a Source Data file.

**Table S1. Total numbers of cells and animals in each experiment type.**

|                                                           |                            |               | Map type                |                             |                     |
|-----------------------------------------------------------|----------------------------|---------------|-------------------------|-----------------------------|---------------------|
|                                                           |                            |               | mPFC-BLA to<br>mPFC-BLA | mPFC-BLA to<br>non-mPFC-BLA | Random to<br>random |
| Number of<br>postsynaptic<br>cells (maps)                 | Ventral<br>mPFC<br>(IL+DP) | L2            | 10                      | 7                           | 10                  |
|                                                           |                            | L3            | 9                       | 8                           | 0                   |
|                                                           |                            | L5            | 19                      | 4                           | 8                   |
|                                                           |                            | L6            | 0                       | 0                           | 0                   |
|                                                           | Dorsal<br>mPFC<br>(PL+Cg)  | All<br>layers | 9                       | 2                           | 6                   |
| Number of<br>stimulated<br>cells<br>(responsive)<br>*, ** | Ventral<br>mPFC<br>(IL+DP) | L2            | 883                     | 586                         | 1169                |
|                                                           |                            | L3            | 1161                    | 846                         | 0                   |
|                                                           |                            | L5            | 1439                    | 500                         | 913                 |
|                                                           | Dorsal<br>mPFC<br>(PL+Cg)  | All<br>layers | 659                     | 150                         | 474                 |
| Number of<br>animals ***                                  | Ventral<br>mPFC<br>(IL+DP) | L2            | 7                       | 6                           | 4                   |
|                                                           |                            | L3            | 8                       | 5                           | 0                   |
|                                                           |                            | L5            | 14                      | 3                           | 6                   |
|                                                           | Dorsal<br>mPFC<br>(PL+Cg)  | All<br>layers | 8                       | 2                           | 4                   |

\* In this Table, all stimulated cells within a given map are considered to be in the same layer as the postsynaptic cell of the same map.

\*\* Only stimulated cells determined to have spiked in response to stimulation by their GCaMP6s signal are counted.

\*\*\* The same animal can be counted multiple times when it was used for recording from cells in different regions or from different cell types (mPFC-BLA cells and non-mPFC-BLA cells).  $n = 38$  animals were used in total for recording in this study.

**Table S2. Numbers of cells per each individual experiment.**

| Map type             | Recorded (postsynaptic) cell |       | Stimulated cells |           |              |           |
|----------------------|------------------------------|-------|------------------|-----------|--------------|-----------|
|                      | Region                       | Layer | # total          | # spiking | # included * | % spiking |
| mPFC-BLA to mPFC-BLA | IL                           | 5     | 45               | 35        | 34           | 77.8      |
|                      | IL                           | 2     | 204              | 143       | 138          | 70.1      |
|                      | IL                           | 3     | 160              | 141       | 129          | 88.1      |
|                      | IL                           | 3     | 116              | 89        | 81           | 76.7      |
|                      | IL                           | 3     | 246              | 242       | 228          | 98.4      |
|                      | IL                           | 3     | 179              | 159       | 154          | 88.8      |
|                      | DP                           | 5     | 32               | 13        | 13           | 40.6      |
|                      | DP                           | 5     | 236              | 234       | 233          | 99.2      |
|                      | PL                           | 5     | 245              | 215       | 112          | 87.8      |
|                      | PL                           | 5     | 169              | 72        | 70           | 42.6      |
|                      | IL                           | 5     | 118              | 104       | 101          | 88.1      |
|                      | PL                           | 5     | 79               | 67        | 65           | 84.8      |
|                      | IL                           | 5     | 94               | 83        | 81           | 88.3      |
|                      | PL                           | 3     | 63               | 21        | 20           | 33.3      |
|                      | IL                           | 2     | 152              | 130       | 128          | 85.5      |
|                      | PL                           | 2     | 89               | 49        | 48           | 55.1      |
|                      | PL                           | 5     | 41               | 21        | 21           | 51.2      |
|                      | IL                           | 3     | 186              | 166       | 162          | 89.2      |
|                      | IL                           | 5     | 175              | 153       | 152          | 87.4      |
|                      | PL                           | 3     | 117              | 97        | 95           | 82.9      |
|                      | PL                           | 2     | 77               | 61        | 61           | 79.2      |
|                      | DP                           | 5     | 179              | 136       | 131          | 76.0      |
|                      | IL                           | 3     | 118              | 111       | 106          | 94.1      |
|                      | IL                           | 5     | 88               | 56        | 56           | 63.6      |
|                      | PL                           | 3     | 93               | 56        | 54           | 60.2      |
|                      | IL                           | 2     | 94               | 74        | 70           | 78.7      |
|                      | IL                           | 5     | 56               | 43        | 43           | 76.8      |
|                      | IL                           | 2     | 94               | 82        | 81           | 87.2      |
|                      | IL                           | 2     | 66               | 54        | 54           | 81.8      |
|                      | IL                           | 5     | 95               | 45        | 44           | 47.4      |
|                      | IL                           | 5     | 59               | 26        | 20           | 44.1      |
|                      | IL                           | 5     | 64               | 42        | 40           | 65.6      |
|                      | IL                           | 3     | 76               | 50        | 44           | 65.8      |
|                      | DP                           | 5     | 90               | 63        | 47           | 70.0      |
|                      | DP                           | 5     | 119              | 67        | 67           | 56.3      |



|                                         |    |   |     |     |     |      |
|-----------------------------------------|----|---|-----|-----|-----|------|
|                                         | IL | 3 | 126 | 121 | 108 | 96.0 |
|                                         | IL | 5 | 89  | 63  | 58  | 70.8 |
|                                         | IL | 5 | 80  | 51  | 50  | 63.8 |
|                                         | IL | 2 | 40  | 31  | 31  | 77.5 |
|                                         | IL | 2 | 78  | 76  | 71  | 97.4 |
|                                         | IL | 2 | 103 | 87  | 78  | 84.5 |
|                                         | IL | 2 | 111 | 96  | 84  | 86.5 |
|                                         | IL | 2 | 145 | 110 | 109 | 75.9 |
|                                         | IL | 3 | 113 | 82  | 79  | 72.6 |
|                                         | IL | 5 | 118 | 101 | 101 | 85.6 |
|                                         | IL | 5 | 134 | 93  | 92  | 69.4 |
|                                         | IL | 5 | 47  | 31  | 31  | 66.0 |
| mPFC-<br>BLA to<br>non-<br>mPFC-<br>BLA | Cg | 5 | 118 | 88  | 88  | 74.6 |
|                                         | IL | 3 | 246 | 225 | 224 | 91.5 |
|                                         | IL | 2 | 148 | 70  | 68  | 47.3 |
|                                         | IL | 5 | 211 | 194 | 194 | 91.9 |
|                                         | IL | 5 | 113 | 106 | 106 | 93.8 |
|                                         | IL | 3 | 100 | 88  | 88  | 88.0 |
|                                         | IL | 3 | 93  | 79  | 78  | 84.9 |
|                                         | IL | 2 | 110 | 86  | 86  | 78.2 |
|                                         | IL | 2 | 66  | 35  | 35  | 53.0 |
|                                         | DP | 5 | 181 | 136 | 136 | 75.1 |
|                                         | IL | 2 | 101 | 90  | 90  | 89.1 |
|                                         | IL | 2 | 124 | 106 | 106 | 85.5 |
|                                         | IL | 2 | 135 | 110 | 110 | 81.5 |
|                                         | IL | 5 | 70  | 64  | 64  | 91.4 |
|                                         | IL | 3 | 114 | 77  | 77  | 67.5 |
|                                         | IL | 3 | 151 | 131 | 130 | 86.8 |
|                                         | IL | 3 | 109 | 102 | 101 | 93.6 |
|                                         | IL | 3 | 104 | 99  | 99  | 95.2 |
|                                         | IL | 2 | 100 | 89  | 88  | 89.0 |
|                                         | PL | 3 | 92  | 62  | 62  | 67.4 |
| Random<br>to<br>random                  | IL | 3 | 71  | 45  | 45  | 63.4 |
|                                         | IL | 5 | 155 | 143 | 141 | 92.3 |
|                                         | Cg | 5 | 91  | 78  | 78  | 85.7 |
|                                         | IL | 5 | 106 | 105 | 104 | 99.1 |
|                                         | IL | 5 | 106 | 104 | 102 | 98.1 |
|                                         | IL | 5 | 156 | 137 | 135 | 87.8 |
|                                         | PL | 5 | 109 | 63  | 63  | 57.8 |

|  |    |   |     |     |     |      |
|--|----|---|-----|-----|-----|------|
|  | PL | 5 | 142 | 129 | 129 | 90.8 |
|  | PL | 5 | 50  | 43  | 42  | 86.0 |
|  | PL | 5 | 126 | 115 | 114 | 91.3 |
|  | IL | 5 | 151 | 132 | 131 | 87.4 |
|  | IL | 5 | 163 | 143 | 142 | 87.7 |
|  | IL | 5 | 129 | 109 | 109 | 84.5 |
|  | IL | 2 | 104 | 90  | 88  | 86.5 |
|  | IL | 5 | 117 | 40  | 40  | 34.2 |
|  | Cg | 2 | 69  | 46  | 46  | 66.7 |
|  | IL | 2 | 201 | 193 | 161 | 96.0 |
|  | IL | 2 | 148 | 144 | 142 | 97.3 |
|  | IL | 2 | 158 | 152 | 138 | 96.2 |
|  | IL | 2 | 93  | 72  | 70  | 77.4 |
|  | IL | 2 | 73  | 57  | 57  | 78.1 |
|  | IL | 2 | 176 | 170 | 166 | 96.6 |
|  | IL | 2 | 85  | 68  | 63  | 80.0 |
|  | IL | 2 | 157 | 147 | 121 | 93.6 |
|  | IL | 2 | 97  | 76  | 75  | 78.4 |

\* Cells included in the analysis, after exclusion of all stimulated cells according to criteria detailed in Methods.

**Table S3. Statistics for electrophysiological properties of all cell types.**

| Property              | Cell type |       |        |              |       |       |             |       |       | Kruskal-Wallis test |                      | Post hoc comparisons ( <i>p</i> value) |                     |                              |  |
|-----------------------|-----------|-------|--------|--------------|-------|-------|-------------|-------|-------|---------------------|----------------------|----------------------------------------|---------------------|------------------------------|--|
|                       | mPFC-BLA  |       |        | Non-mPFC-BLA |       |       | Random mPFC |       |       | $\chi^2$            | <i>p</i> value       | mPFC-BLA vs. non-mPFC-BLA              | mPFC-BLA vs. random | Non-mPFC-BLA vs. random mPFC |  |
|                       | <i>n</i>  | Mean  | SEM    | <i>n</i>     | Mean  | SEM   | <i>n</i>    | Mean  | SEM   |                     |                      |                                        |                     |                              |  |
| Rin (M $\Omega$ )     | 36        | 217.4 | 12.3   | 19           | 188.8 | 15.0  | 17          | 188.1 | 21.1  | 2.7                 | 0.26                 | 0.49                                   | 0.29                | 0.93                         |  |
| Cm (pF)               | 36        | 119.2 | 9.2    | 19           | 139.2 | 8.8   | 17          | 129.6 | 6.5   | 6.0                 | 0.051                | 0.063                                  | 0.23                | 0.89                         |  |
| Max firing rate (Hz)  | 36        | 30.9  | 1.3    | 19           | 30.5  | 1.9   | 17          | 33.1  | 2.4   | 0.56                | 0.75                 | 0.97                                   | 0.82                | 0.75                         |  |
| Output gain (Hz/pA)   | 36        | 0.13  | 0.0077 | 19           | 0.10  | 0.005 | 17          | 0.12  | 0.010 | 7.8                 | 0.020                | 0.015                                  | 0.63                | 0.28                         |  |
| Adaptation index      | 36        | 3.3   | 0.21   | 19           | 1.95  | 0.16  | 17          | 2.3   | 0.20  | 24.1                | 5.8 $\times 10^{-5}$ | 6.0 $\times 10^{-5}$                   | 0.016               | 0.24                         |  |
| Bursting index        | 36        | 1.32  | 0.078  | 19           | 1.37  | 0.095 | 17          | 1.30  | 0.12  | 0.69                | 0.71                 | 0.74                                   | 0.99                | 0.74                         |  |
| Sag ratio             | 36        | 0.14  | 0.014  | 19           | 0.076 | 0.015 | 17          | 0.10  | 0.016 | 11.7                | 0.0029               | 0.0021                                 | 0.25                | 0.31                         |  |
| Spike threshold (mV)  | 36        | -38.5 | 0.66   | 19           | -36.8 | 0.91  | 17          | -39.3 | 0.93  | 3.9                 | 0.14                 | 0.24                                   | 0.86                | 0.16                         |  |
| Spike half-width (ms) | 36        | 1.52  | 0.069  | 19           | 1.29  | 0.065 | 17          | 1.27  | 0.09  | 6.3                 | 0.044                | 0.10                                   | 0.10                | 1.00                         |  |
| Spike amplitude (mV)  | 36        | 85.1  | 0.66   | 19           | 85.0  | 1.6   | 17          | 87.0  | 2.2   | 3.3                 | 0.19                 | 0.94                                   | 0.17                | 0.39                         |  |
| Holding current (pA)  | 34        | -44.6 | 6.2    | 19           | -10.7 | 5.7   | 18          | -15.2 | 7.4   | 15.2                | 5.0 $\times 10^{-4}$ | 0.0013                                 | 0.014               | 0.83                         |  |

The Kruskal-Wallis test with multiple post hoc comparisons using Tukey's Honestly Significant Difference (HSD) procedure was used for comparing electrophysiological properties across cell types.

**Table S4. Parameters used for detection and modeling of EPSCs.**

| Parameter                            | Value                                                              | Description                                                                                                                 |
|--------------------------------------|--------------------------------------------------------------------|-----------------------------------------------------------------------------------------------------------------------------|
| Detrending parameters                |                                                                    |                                                                                                                             |
| f_sample                             | 5000 Hz                                                            | Frequency to which the signal was downsampled (using the resample_poly function)                                            |
| order_filter_len                     | 50 ms                                                              | Sliding window of the 10 <sup>th</sup> percentile filter                                                                    |
| f_to_decimate                        | 200 Hz                                                             | Frequency to which the percentile-filtered trace was downsampled to find the baseline                                       |
| Median filter order                  | 3 points                                                           | Median filter width applied to the 200 Hz signal                                                                            |
| $\widehat{SD}$                       | 1.4826×MAD                                                         | Standard deviation was estimated robustly using this formula, where MAD is the median absolute deviation around the median. |
| Deconvolution parameters (OASIS)     |                                                                    |                                                                                                                             |
| noise_factor                         | 0.8                                                                | Noise is this factor $\times \widehat{SD}$                                                                                  |
| $\tau_{decay}$                       | 3.5 ms                                                             | Decay time constant of the kernel                                                                                           |
| $\tau_{rise}$                        | 0.7 ms                                                             | Rise time constant of the kernel                                                                                            |
| Kernel formula                       | $n \times \exp(-t/\tau_{decay}) \times (1 - \exp(-t/\tau_{rise}))$ | where $n$ normalizes the peak to 1                                                                                          |
| max_iter                             | 10                                                                 | Number of iterations OASIS algorithms runs for                                                                              |
| penalty                              | 1                                                                  | 1 means it uses the L1 penalty to sparsely reconstruct the signal.                                                          |
| oasis.functions.deconvolve           |                                                                    | The function in the OASIS library used for the deconvolution                                                                |
| Peak detection parameters            |                                                                    |                                                                                                                             |
| noise_factor                         | 0.5                                                                | Minimum peak height and prominence is this factor $\times \widehat{SD}$                                                     |
| split_gap_ms                         | 2.0 ms                                                             | Minimum gap between two peaks                                                                                               |
| conv_filt_ms                         | 2.5 ms                                                             | Width of the triangular filter used on the deconvolved trace                                                                |
| scipy.signal.find_peaks              |                                                                    | The function used to find peaks in the deconvolved trace                                                                    |
| Segmentation (clustering) parameters |                                                                    |                                                                                                                             |

|                    |                                     |                                                                                                                                                                                                                                                                                                               |
|--------------------|-------------------------------------|---------------------------------------------------------------------------------------------------------------------------------------------------------------------------------------------------------------------------------------------------------------------------------------------------------------|
| thresh             | 1.8                                 | This factor $\times \widehat{SD}$ is the height below which the denoised trace must go to split it. Lower thresh leads to more events per cluster.                                                                                                                                                            |
| pre_c_ms           | 10 ms                               | The previous cluster is combined if it is within this distance when it falls below the threshold                                                                                                                                                                                                              |
| post_c_ms          | 20 ms                               | The next cluster is combined if it is within this distance when it falls below the threshold                                                                                                                                                                                                                  |
| pre_j_ms           | 10 ms                               | The previous cluster is combined if it is within this distance of the first event                                                                                                                                                                                                                             |
| post_j_ms          | 10 ms                               | The next cluster is combined if it is within this distance of the last event                                                                                                                                                                                                                                  |
| Fitting parameters |                                     |                                                                                                                                                                                                                                                                                                               |
| jitter             | 10 ms                               | How far the event onset time $o$ can be fit from the initial estimate $\hat{o}$                                                                                                                                                                                                                               |
| height_factor_high | 3                                   | how many bigger times the event height $h$ can be fit from the initial estimate $\hat{h}$                                                                                                                                                                                                                     |
| height_factor_low  | 15                                  | how many smaller times the event height $h$ can be fit from the initial estimate $\hat{h}$                                                                                                                                                                                                                    |
| tau1_min           | 0.5 ms                              | Lower bound of $\tau_{decay}$                                                                                                                                                                                                                                                                                 |
| tau1_max           | 50 ms                               | Upper bound of $\tau_{decay}$                                                                                                                                                                                                                                                                                 |
| tau2_min           | 0.1 ms                              | Lower bound of $\tau_{rise}$                                                                                                                                                                                                                                                                                  |
| tau2_max           | 10 ms                               | Upper bound of $\tau_{rise}$                                                                                                                                                                                                                                                                                  |
| noise_factor       | 1                                   | The root mean square error between the signal and its reconstruction $[RMS(S - \tilde{S})]$ is divided by noise_factor $\times \widehat{SD}$ to normalize it.                                                                                                                                                 |
| regularization     | 0.2                                 | The root mean square error between the onset time and its estimate $[RMS(o - \hat{o})]$ is multiplied by this number to get the regularization. Using these values of noise_factor and regularization yields $\frac{RMS(S - \tilde{S})}{\widehat{SD}} + \frac{RMS(o - \hat{o})}{5}$ which is being minimized. |
| maxiter_DA         | 5000 $\times$ num_events_in_cluster | num_events_in_cluster is the number of events in the cluster                                                                                                                                                                                                                                                  |

|                |                                                      |  |
|----------------|------------------------------------------------------|--|
| maxfev_DA      | $5000 \times \sqrt{\text{num\_events\_in\_cluster}}$ |  |
| maxiter_Powell | $300 \times \text{num\_events\_in\_cluster}$         |  |
| maxfev_Powell  | $3000 \times \text{num\_events\_in\_cluster}$        |  |

**Table S5. Priors used in the Bayesian connectivity models.**

| Prior                  | Value   | Comments                                                                                              |
|------------------------|---------|-------------------------------------------------------------------------------------------------------|
| evoked_window          | 90 ms   | Disregarding the last 10 ms before the next stimulation                                               |
| rate_mu                | 4.83 Hz | Calculated empirically from the distribution of rates during spontaneous intervals over all cells     |
| rate_sigma             | 3.79 Hz |                                                                                                       |
| Evoked_per_trial_mu    | 1.0     | An informative prior; these values define a connected cell in the model assuming connection (model 2) |
| Evoked_per_trial_sigma | 0.35    |                                                                                                       |
| bump_center_mu         | 12.7 ms | Calculated empirically from the data used in Figure 2b                                                |
| bump_width_mu          | 6.33 ms |                                                                                                       |
| bump_center_sigma      | 6.33 ms |                                                                                                       |
| bump_width_sigma       | 1.5 ms  | A small value to for computational stability                                                          |
